# Supplementary material for: Quantitative Proteomic Analysis of Hepatic Tissue of T2DM Rhesus Macaque
Source: J Diabetes Res. 2017 Dec 14;2017:3601708. doi: 10.1155/2017/3601708 (PMC5748286; doi:10.1155/2017/3601708)
Supplement: Supplementary Materials — Table S1: Profile of differentially expressed proteins. [file 3601708.f1.xlsx]

## Sheet: S1
Identified Proteins	Accession Number	Molecular Weight	GeneName	Fold Change
Uncharacterized protein OS=Macaca mulatta GN=ADH4 PE=3 SV=1	F7GMI7	40 kDa	ADH4	0.45
Glutathione S-transferase OS=Macaca mulatta GN=EGK_15014 PE=3 SV=1	G7MPL2	25 kDa	EGK_15014	0.473684
Hexokinase OS=Macaca mulatta GN=GCK PE=3 SV=1	F6PLG6	52 kDa	GCK	0.5
Cytochrome P450 OS=Macaca mulatta GN=EGK_17674 PE=3 SV=1	G7MY68	58 kDa	EGK_17674	0.545455
Amine oxidase (Fragment) OS=Macaca mulatta GN=AOC1 PE=3 SV=1	F6TU01	88 kDa	AOC1	0.55
Uncharacterized protein OS=Macaca mulatta GN=EGK_12095 PE=3 SV=1	G7MJR4	77 kDa	EGK_12095	0.555556
Uncharacterized protein OS=Macaca mulatta GN=EGK_15803 PE=4 SV=1	G7MT40	69 kDa	EGK_15803	0.555556
Acetyl-coenzyme A synthetase, cytoplasmic OS=Macaca mulatta GN=ACSS2 PE=4 SV=1	F7EMD9	80 kDa	ACSS2	0.588235
Uncharacterized protein OS=Macaca mulatta GN=GLDC PE=3 SV=1	F6PUG5	115 kDa	GLDC	0.590909
Heat shock protein beta-1 OS=Macaca mulatta GN=HSPB1 PE=2 SV=1	F6XTF7	23 kDa	HSPB1	0.611111
Uncharacterized protein OS=Macaca mulatta GN=DCXR PE=3 SV=1	F7FSI7	26 kDa	DCXR	0.611111
Uncharacterized protein OS=Macaca mulatta GN=EGK_05543 PE=4 SV=1	G7NAK6	14 kDa	EGK_05543	0.611111
Uncharacterized protein (Fragment) OS=Macaca mulatta GN=CBR1 PE=3 SV=1	F7D1C5	30 kDa	CBR1	0.611111
Peroxisomal multifunctional enzyme type 2 isoform 2 OS=Macaca mulatta GN=HSD17B4 PE=2 SV=1	H9Z8E0	80 kDa	HSD17B4	0.611111
10 kDa heat shock protein, mitochondrial OS=Macaca mulatta GN=LOC710026 PE=2 SV=1	F7BG90	11 kDa	LOC710026	0.625
Annexin OS=Macaca mulatta GN=EGK_19651 PE=3 SV=1	F6YNN1	37 kDa	EGK_19651	0.625
Sorbitol dehydrogenase OS=Macaca mulatta GN=SORD PE=2 SV=1	F6XVN0	38 kDa	SORD	0.625
Argininosuccinate synthase OS=Macaca mulatta GN=ASS1 PE=2 SV=1	H9ESN2	47 kDa	ASS1	0.631579
Ribonuclease UK114 OS=Macaca mulatta GN=HRSP12 PE=2 SV=1	H9FNK5	14 kDa	HRSP12	0.642857
Myxovirus resistance protein 1 OS=Macaca mulatta GN=EGK_13223 PE=3 SV=1	G7MMR0	74 kDa	EGK_13223	0.647059
Catechol O-methyltransferase isoform MB-COMT OS=Macaca mulatta GN=COMT PE=2 SV=1	F6QFW9	30 kDa	COMT	0.65
Betaine--homocysteine S-methyltransferase 1 OS=Macaca mulatta GN=EGK_16628 PE=4 SV=1	G7MUU6	45 kDa	EGK_16628	0.666667
Retinol dehydrogenase 16 OS=Macaca mulatta GN=RDH16 PE=3 SV=1	F7GXD1	35 kDa	RDH16	0.681818
Uncharacterized protein (Fragment) OS=Macaca mulatta GN=ALDH2 PE=3 SV=1	F6USI7	51 kDa	ALDH2	0.684211
Uncharacterized protein OS=Macaca mulatta GN=TTC36 PE=4 SV=1	F7FZ36	20 kDa	TTC36	0.6875
Uncharacterized protein OS=Macaca mulatta GN=EGK_18045 PE=3 SV=1	G7MX57	70 kDa	EGK_18045	0.6875
Peroxisomal bifunctional enzyme isoform 1 OS=Macaca mulatta GN=EHHADH PE=2 SV=1	F7GFA8	79 kDa	EHHADH	0.7
Heat shock 70 kDa protein 1A/1B OS=Macaca mulatta GN=HSPA1B PE=2 SV=1	G7MRK7	70 kDa	HSPA1B	0.7
Bifunctional ATP-dependent dihydroxyacetone kinase/FAD-AMP lyase (Cyclizing) OS=Macaca mulatta GN=DAK PE=2 SV=1	H9EV13	59 kDa	DAK	0.7
Uncharacterized protein OS=Macaca mulatta GN=KHK PE=4 SV=1	F7GPR3	33 kDa	KHK	0.705882
Catalase OS=Macaca mulatta GN=CAT PE=2 SV=1	G7NDL6	60 kDa	CAT	0.722222
Phenazine biosynthesis-like domain-containing protein isoform a OS=Macaca mulatta GN=PBLD PE=2 SV=1	F6ULX2	32 kDa	PBLD	0.736842
3-hydroxyanthranilate 3,4-dioxygenase OS=Macaca mulatta GN=HAAO PE=3 SV=1	F6X7R6	34 kDa	HAAO	0.736842
Uncharacterized protein OS=Macaca mulatta GN=AMACR PE=4 SV=1	F6ZM85	43 kDa	AMACR	0.736842
Uncharacterized protein OS=Macaca mulatta GN=PHGDH PE=3 SV=1	F7DRL6	56 kDa	PHGDH	0.736842
Uncharacterized protein (Fragment) OS=Macaca mulatta GN=EGK_20210 PE=3 SV=1	G7N1G5	29 kDa	EGK_20210	0.736842
Alcohol dehydrogenase 1B OS=Macaca mulatta GN=ADH1C PE=2 SV=1	F7HK90	40 kDa	ADH1C	0.75
F7FBB2-DECOY	F7FBB2-DECOY (+1)	?		0.764706
Alcohol dehydrogenase [NADP+] OS=Macaca mulatta GN=AKR1A1 PE=2 SV=1	G7MGP9	37 kDa	AKR1A1	0.764706
Annexin OS=Macaca mulatta GN=ANXA6 PE=2 SV=1	H9ESF6	76 kDa	ANXA6	0.764706
Uncharacterized protein OS=Macaca mulatta GN=IVD PE=3 SV=1	F7BAE1	46 kDa	IVD	0.777778
Uncharacterized protein OS=Macaca mulatta GN=EGK_04755 PE=3 SV=1	G7N8T9	165 kDa	EGK_04755	0.777778
Uncharacterized protein OS=Macaca mulatta GN=EGK_15327 PE=3 SV=1	G7MQB3	53 kDa	EGK_15327	0.809524
UTP--glucose-1-phosphate uridylyltransferase isoform a OS=Macaca mulatta GN=UGP2 PE=2 SV=1	F7DKM9	57 kDa	UGP2	0.8125
Uncharacterized protein OS=Macaca mulatta GN=ATP6V1A PE=2 SV=1	F7HT50	68 kDa	ATP6V1A	1.21739
17-beta-hydroxysteroid dehydrogenase type 6 OS=Macaca mulatta GN=HSD17B6 PE=2 SV=1	F7A368	36 kDa	HSD17B6	1.21739
Uncharacterized protein OS=Macaca mulatta GN=EGK_19726 PE=4 SV=1	G7N256	109 kDa	EGK_19726	1.21739
Uncharacterized protein (Fragment) OS=Macaca mulatta GN=TRIM28 PE=4 SV=1	F7G9W9	78 kDa	TRIM28	1.22727
T-complex protein 1 subunit delta (Fragment) OS=Macaca mulatta GN=CCT4 PE=3 SV=1	F7ENV5	54 kDa	CCT4	1.22727
5-oxoprolinase OS=Macaca mulatta GN=OPLAH PE=2 SV=1	H9EVC4	138 kDa	OPLAH	1.22727
Acyl-coenzyme A synthetase ACSM3, mitochondrial OS=Macaca mulatta GN=ACSM3 PE=4 SV=1	F7APW8	66 kDa	ACSM3	1.2381
Enoyl-CoA delta isomerase 1, mitochondrial isoform 1 (Fragment) OS=Macaca mulatta GN=DCI PE=2 SV=1	H9F2L2	31 kDa	DCI	1.25
Adenylate kinase isoenzyme 1 OS=Macaca mulatta GN=AK1 PE=3 SV=1	F6RRJ7	23 kDa	AK1	1.26923
Peptidyl-prolyl cis-trans isomerase OS=Macaca mulatta GN=PPIB PE=2 SV=1	F7HFK5	24 kDa	PPIB	1.27273
Fibronectin isoform 1 preproprotein OS=Macaca mulatta GN=FN1 PE=2 SV=1	G7N8U7	273 kDa	FN1	1.27273
Leucine-rich PPR motif-containing protein, mitochondrial OS=Macaca mulatta GN=LRPPRC PE=2 SV=1	H9FNG0	158 kDa	LRPPRC	1.28571
Eukaryotic translation initiation factor 3 subunit M OS=Macaca mulatta GN=EIF3M PE=3 SV=1	F6QDK1	43 kDa	EIF3M	1.29167
Ubiquitin-conjugating enzyme E2 variant 1 isoform d OS=Macaca mulatta GN=TMEM189-UBE2V1 PE=2 SV=1	F6VF23	16 kDa	TMEM189-UBE2V1	1.30435
Carnitine O-palmitoyltransferase 2, mitochondrial OS=Macaca mulatta GN=CPT2 PE=2 SV=1	F6SJN6	74 kDa	CPT2	1.30435
Delta(24)-sterol reductase OS=Macaca mulatta GN=DHCR24 PE=2 SV=1	F7ECX2	60 kDa	DHCR24	1.30769
Hemopexin OS=Macaca mulatta GN=HPX PE=3 SV=1	F7C9A4	52 kDa	HPX	1.31818
40S ribosomal protein S5 OS=Macaca mulatta GN=RPS5 PE=2 SV=1	F7HNZ0	23 kDa	RPS5	1.33333
Glutamate--cysteine ligase catalytic subunit isoform a OS=Macaca mulatta GN=GCLC PE=2 SV=1	F7EZ43	73 kDa	GCLC	1.33333
Inorganic pyrophosphatase 2, mitochondrial isoform 1 (Fragment) OS=Macaca mulatta GN=PPA2 PE=2 SV=1	H9F5C5	37 kDa	PPA2	1.34783
Uncharacterized protein OS=Macaca mulatta GN=EGK_05806 PE=4 SV=1	G7NBC1	43 kDa	EGK_05806	1.34783
Aconitate hydratase, mitochondrial OS=Macaca mulatta GN=ACO2 PE=2 SV=1	F7BKH7	85 kDa	ACO2	1.36364
Uncharacterized protein OS=Macaca mulatta GN=EGK_18288 PE=4 SV=1	G7MYA8	277 kDa	EGK_18288	1.36842
Cofilin-1 OS=Macaca mulatta GN=CFL1 PE=2 SV=1	I0FG05	19 kDa	CFL1	1.375
Uncharacterized protein OS=Macaca mulatta GN=TGFBI PE=4 SV=1	F6YNC7	75 kDa	TGFBI	1.38095
L-plastin OS=Macaca mulatta GN=LCP1 PE=2 SV=1	F7HQU5	70 kDa	LCP1	1.38095
Uncharacterized protein OS=Macaca mulatta GN=STT3B PE=4 SV=1	F6UAJ8	94 kDa	STT3B	1.38095
Uncharacterized protein OS=Macaca mulatta GN=RPN2 PE=4 SV=1	F7CA11	69 kDa	RPN2	1.3913
Annexin OS=Macaca mulatta GN=ANXA4 PE=2 SV=1	F6TG27	36 kDa	ANXA4	1.3913
Prolargin OS=Macaca mulatta GN=PRELP PE=2 SV=1	F7FA61	44 kDa	PRELP	1.4
Uncharacterized protein OS=Macaca mulatta GN=ACMSD PE=4 SV=1	F6SQG9	38 kDa	ACMSD	1.4
Bifunctional aminoacyl-tRNA synthetase OS=Macaca mulatta GN=EPRS PE=2 SV=1	H9Z685	170 kDa	EPRS	1.4
Uncharacterized protein OS=Macaca mulatta GN=LOC714855 PE=4 SV=1	F6ZCN6	30 kDa	LOC714855	1.40909
Keratan sulfate proteoglycan lumican OS=Macaca mulatta GN=LUM PE=2 SV=1	F6PRP0	38 kDa	LUM	1.40909
Eukaryotic translation initiation factor 3 subunit F OS=Macaca mulatta GN=EIF3F PE=3 SV=1	F6V6M4	38 kDa	EIF3F	1.40909
40S ribosomal protein S15a OS=Macaca mulatta GN=RPS15A PE=2 SV=1	F7HIR1	15 kDa	RPS15A	1.40909
Uncharacterized protein OS=Macaca mulatta PE=4 SV=1	F7F2G6	228 kDa	4	1.40909
Protein USO1-like protein (Fragment) OS=Macaca mulatta GN=EGK_15778 PE=4 SV=1	G7MT19	98 kDa	EGK_15778	1.41667
Uncharacterized protein OS=Macaca mulatta GN=ILF2 PE=4 SV=1	F7HE92	41 kDa	ILF2	1.41667
60S ribosomal protein L4 OS=Macaca mulatta GN=RPL4 PE=2 SV=1	F7C322	48 kDa	RPL4	1.42308
28S ribosomal protein S5, mitochondrial OS=Macaca mulatta GN=MRPS5 PE=2 SV=1	H9FYL6	48 kDa	MRPS5	1.42857
Uncharacterized protein (Fragment) OS=Macaca mulatta GN=EGK_13473 PE=4 SV=1	G7MNP8	55 kDa	EGK_13473	1.42857
Histone-binding protein RBBP4 isoform a OS=Macaca mulatta GN=RBBP4 PE=2 SV=1	F6RJL6	48 kDa	RBBP4	1.42857
Uncharacterized protein OS=Macaca mulatta GN=PGM3 PE=4 SV=1	F7FDZ2	60 kDa	PGM3	1.43478
Transmembrane emp24 domain-containing protein 9 OS=Macaca mulatta GN=TMED9 PE=2 SV=1	F6WAB3	27 kDa	TMED9	1.43478
14-3-3 protein eta OS=Macaca mulatta GN=YWHAH PE=2 SV=1	F6RIX6	28 kDa	YWHAH	1.44828
26S protease regulatory subunit 7 isoform 1 OS=Macaca mulatta GN=PSMC2 PE=2 SV=1	H9FXE8	49 kDa	PSMC2	1.45
Signal transducer and activator of transcription OS=Macaca mulatta GN=STAT3 PE=3 SV=1	F7G8G5	88 kDa	STAT3	1.45
Uncharacterized protein OS=Macaca mulatta GN=PCK1 PE=3 SV=1	F6ZDT7	69 kDa	PCK1	1.45
Heterogeneous nuclear ribonucleoprotein U-like protein 1 isoform a OS=Macaca mulatta GN=HNRNPUL1 PE=2 SV=1	H9EMU1	96 kDa	HNRNPUL1	1.45455
Uncharacterized protein OS=Macaca mulatta GN=HNRNPDL PE=4 SV=1	F6QI99	27 kDa	HNRNPDL	1.45455
Uncharacterized protein OS=Macaca mulatta GN=RPL7 PE=4 SV=1	F6SBG9	28 kDa	RPL7	1.45455
3-hydroxyacyl-CoA dehydrogenase type-2 OS=Macaca mulatta GN=HSD17B10 PE=2 SV=1	F7H1H7	27 kDa	HSD17B10	1.45455
EF-hand domain-containing protein D2 OS=Macaca mulatta GN=EFHD2 PE=2 SV=1	F6UUX9	27 kDa	EFHD2	1.45455
Proteasome subunit alpha type OS=Macaca mulatta GN=PSMA3 PE=2 SV=1	F7E2S4	28 kDa	PSMA3	1.45833
Uncharacterized protein OS=Macaca mulatta GN=CAPNS1 PE=4 SV=1	F6X8A9	41 kDa	CAPNS1	1.45833
Uncharacterized protein OS=Macaca mulatta GN=THBS1 PE=4 SV=1	F6WIY2	129 kDa	THBS1	1.47059
28S ribosomal protein S35, mitochondrial isoform 1 OS=Macaca mulatta GN=MRPS35 PE=2 SV=1	H9FY44	37 kDa	MRPS35	1.47619
28S ribosomal protein S31, mitochondrial OS=Macaca mulatta GN=MRPS31 PE=2 SV=1	H9FNK2	44 kDa	MRPS31	1.47619
Uncharacterized protein OS=Macaca mulatta GN=ANPEP PE=4 SV=1	F6VKN1	110 kDa	ANPEP	1.47619
Coatomer subunit beta OS=Macaca mulatta GN=COPB1 PE=4 SV=1	F7GF98	107 kDa	COPB1	1.47826
Purine nucleoside phosphorylase OS=Macaca mulatta GN=EGK_20852 PE=3 SV=1	F7H566	32 kDa	EGK_20852	1.5
Glucosamine-6-phosphate isomerase OS=Macaca mulatta GN=GNPDA1 PE=3 SV=1	F6ZHX4	33 kDa	GNPDA1	1.5
Uncharacterized protein OS=Macaca mulatta GN=GYS2 PE=4 SV=1	F7FTD2	81 kDa	GYS2	1.5
Uncharacterized protein OS=Macaca mulatta GN=CPT1A PE=3 SV=1	F7G7S7	86 kDa	CPT1A	1.5
6-pyruvoyl tetrahydrobiopterin synthase OS=Macaca mulatta GN=PTS PE=2 SV=1	F7DZN4	16 kDa	PTS	1.5
Uncharacterized protein OS=Macaca mulatta GN=TRMT10C PE=4 SV=1	F7EUC5	49 kDa	TRMT10C	1.52
Guanine nucleotide-binding protein subunit beta-2-like 1 OS=Macaca mulatta GN=GNB2L1 PE=2 SV=1	G7MV11	35 kDa	GNB2L1	1.52174
Uncharacterized protein OS=Macaca mulatta GN=UMPS PE=2 SV=1	F7H6L5	52 kDa	UMPS	1.52381
N-alpha-acetyltransferase 15, NatA auxiliary subunit OS=Macaca mulatta GN=NAA15 PE=2 SV=1	F7EDH4	101 kDa	NAA15	1.52381
Annexin OS=Macaca mulatta GN=ANXA1 PE=2 SV=1	F7D2H1	39 kDa	ANXA1	1.52381
Eukaryotic peptide chain release factor subunit 1 OS=Macaca mulatta GN=ETF1 PE=2 SV=1	F7CTK0	49 kDa	ETF1	1.52381
Uncharacterized protein OS=Macaca mulatta GN=EGK_18884 PE=4 SV=1	G7MZ70	221 kDa	EGK_18884	1.52632
14-3-3 protein beta/alpha OS=Macaca mulatta GN=YWHAB PE=2 SV=1	F6XFG9	28 kDa	YWHAB	1.54167
Uncharacterized protein OS=Macaca mulatta GN=GLYATL1 PE=4 SV=1	F6QM65	35 kDa	GLYATL1	1.55
N-acylneuraminate cytidylyltransferase OS=Macaca mulatta GN=CMAS PE=2 SV=1	F7H7Q2	48 kDa	CMAS	1.55556
Nucleoside diphosphate kinase OS=Macaca mulatta GN=NME2 PE=3 SV=1	F7H6X2	30 kDa	NME2	1.56
Uncharacterized protein (Fragment) OS=Macaca mulatta GN=EGK_09713 PE=3 SV=1	G7NKS1	63 kDa	EGK_09713	1.57143
Cytochrome P450 2J2 (Fragment) OS=Macaca mulatta GN=CYP2J2 PE=2 SV=1	H9F486	57 kDa	CYP2J2	1.57895
Uncharacterized protein OS=Macaca mulatta GN=MRPL28 PE=4 SV=1	F6Y8S5	30 kDa	MRPL28	1.57895
Abhydrolase domain-containing protein 10, mitochondrial OS=Macaca mulatta GN=ABHD10 PE=2 SV=1	F6YZH0	34 kDa	ABHD10	1.57895
GTP-binding nuclear protein Ran OS=Macaca mulatta GN=RAN PE=2 SV=1	F7H2M4	24 kDa	RAN	1.58333
Uncharacterized protein OS=Macaca mulatta GN=CA2 PE=4 SV=1	F6TQ14	29 kDa	CA2	1.59091
Phosphatidylinositol transfer protein beta isoform OS=Macaca mulatta GN=PITPNB PE=2 SV=1	F7G7C4	32 kDa	PITPNB	1.6
Putative ATP-dependent RNA helicase DDX5 OS=Macaca mulatta GN=DDX5 PE=2 SV=1	F7A985	69 kDa	DDX5	1.6
Ras-related protein Rab-11B OS=Macaca mulatta GN=RAB11B PE=2 SV=1	F6S443	24 kDa	RAB11B	1.6087
Transgelin OS=Macaca mulatta GN=TAGLN2 PE=2 SV=1	F6RKI4	22 kDa	TAGLN2	1.61111
Uncharacterized protein OS=Macaca mulatta GN=WDR26 PE=4 SV=1	F7G637	59 kDa	WDR26	1.63636
26S proteasome non-ATPase regulatory subunit 3 OS=Macaca mulatta GN=PSMD3 PE=2 SV=1	F6UFI7	61 kDa	PSMD3	1.65
Major vault protein OS=Macaca mulatta GN=MVP PE=2 SV=1	G7NQI2	99 kDa	MVP	1.65
Uncharacterized protein OS=Macaca mulatta GN=C9orf64 PE=2 SV=1	F6WZW8	39 kDa	C9orf64	1.66667
Tyrosine--tRNA ligase OS=Macaca mulatta GN=YARS PE=2 SV=1	G7MI96	59 kDa	YARS	1.7
Uncharacterized protein OS=Macaca mulatta GN=EGK_10901 PE=4 SV=1	G7NLP8	42 kDa	EGK_10901	1.72
Hemoglobin subunit alpha OS=Macaca mulatta GN=HBA1 PE=2 SV=1	I2CVH9	15 kDa	HBA1	1.72727
Isocitrate dehydrogenase [NAD] subunit, mitochondrial OS=Macaca mulatta GN=IDH3B PE=2 SV=1	F6URF2	42 kDa	IDH3B	1.73684
Uncharacterized protein (Fragment) OS=Macaca mulatta GN=SERPING1 PE=3 SV=1	F6QPU2	37 kDa	SERPING1	1.76
Uncharacterized protein (Fragment) OS=Macaca mulatta GN=BGN PE=4 SV=1	F7ESZ3	41 kDa	BGN	1.78261
Sorcin isoform a OS=Macaca mulatta GN=SRI PE=2 SV=1	F7GSM8	22 kDa	SRI	1.8
Uncharacterized protein OS=Macaca mulatta GN=NT5C2 PE=4 SV=1	F7FIW4	47 kDa	NT5C2	1.8
Uncharacterized protein OS=Macaca mulatta GN=P4HA1 PE=4 SV=1	F6WHF6	61 kDa	P4HA1	1.82609
39S ribosomal protein L49, mitochondrial OS=Macaca mulatta GN=MRPL49 PE=2 SV=1	F6ZWE1	19 kDa	MRPL49	1.83333
Collagen alpha-1(VI) chain OS=Macaca mulatta GN=EGK_13158 PE=4 SV=1	G7MMF4	109 kDa	EGK_13158	1.85
ADP-ribosylation factor 4 OS=Macaca mulatta GN=ARF4 PE=2 SV=1	F6XZM8	21 kDa	ARF4	1.87097
Uncharacterized protein OS=Macaca mulatta GN=FGB PE=4 SV=1	F6UZ87	56 kDa	FGB	1.88889
Alpha-1-antichymotrypsin OS=Macaca mulatta GN=SERPINA3 PE=2 SV=1	F6SL79	48 kDa	SERPINA3	1.9
Haptoglobin isoform 2 preproprotein OS=Macaca mulatta GN=HP PE=2 SV=1	H9Z8D4	38 kDa	HP	1.9
Peroxiredoxin-6 OS=Macaca mulatta GN=PRDX6 PE=2 SV=1	F7F6H0	25 kDa	PRDX6	1.9375
Uncharacterized protein (Fragment) OS=Macaca mulatta GN=BCO2 PE=3 SV=1	F6VNP2	62 kDa	BCO2	1.94737
Annexin OS=Macaca mulatta GN=ANXA2 PE=3 SV=1	F7H0C7	39 kDa	ANXA2	1.94737
Transgelin OS=Macaca mulatta GN=TAGLN PE=2 SV=1	F6WXC6	23 kDa	TAGLN	1.95238
Uncharacterized protein OS=Macaca mulatta GN=MPO PE=4 SV=1	F7BAA9	87 kDa	MPO	2
Beta-hexosaminidase OS=Macaca mulatta GN=CELF6 PE=2 SV=1	F7GCB0	61 kDa	CELF6	2
Annexin (Fragment) OS=Macaca mulatta GN=ANXA3 PE=3 SV=1	F6Z8Y2	36 kDa	ANXA3	2
Cathepsin D preproprotein OS=Macaca mulatta GN=CTSD PE=2 SV=1	F7H7Y3	45 kDa	CTSD	2.04762
Uncharacterized protein OS=Macaca mulatta GN=TNC PE=4 SV=1	F7ECK5	172 kDa	TNC	2.05556
Carbonic anhydrase 1 OS=Macaca mulatta GN=CA1 PE=4 SV=1	F7CLQ5	29 kDa	CA1	2.08696
Uncharacterized protein OS=Macaca mulatta GN=EGK_21590 PE=3 SV=1	G8F199	57 kDa	EGK_21590	2.10526
Collagen alpha-3(VI) chain isoform 4 OS=Macaca mulatta GN=COL6A3 PE=2 SV=1	I2CWG4	278 kDa	COL6A3	2.16667
Uncharacterized protein OS=Macaca mulatta GN=KRT1 PE=3 SV=1	F7B777	59 kDa	KRT1	2.17391
Fibrinogen alpha chain OS=Macaca mulatta GN=FGA PE=4 SV=1	F6UZ60	94 kDa	FGA	2.22222
Histone H4 OS=Macaca mulatta GN=LOC704565 PE=2 SV=1	F7HAP8	11 kDa	LOC704565	2.22727
Uncharacterized protein OS=Macaca mulatta GN=FGG PE=4 SV=1	F6UYY8	52 kDa	FGG	2.3913
L-lactate dehydrogenase OS=Macaca mulatta GN=LDHA PE=2 SV=1	H9ES85	40 kDa	LDHA	2.42857
Uncharacterized protein OS=Macaca mulatta GN=NNMT PE=4 SV=1	F7ERX8	30 kDa	NNMT	2.47619
Adipocyte-type fatty acid-binding protein OS=Macaca mulatta GN=FABP4 PE=2 SV=1	F7GLY0	15 kDa	FABP4	3
Pentaxin OS=Macaca mulatta GN=CRP PE=3 SV=1	F7DHQ1	25 kDa	CRP	3.47059
Serum amyloid A protein OS=Macaca mulatta GN=LOC694944 PE=3 SV=1	F7DY68	14 kDa	LOC694944	6.14286
